# Supplementary material
Source: publisher figshare collection journal article supplement (https://asha.figshare.com/articles/dataset/_/19586065)
Supplement: Supplementary file 2 [file 1]

#### Supplemental Material S4. Respiratory mechanisms: empirical studies.

| Author(s), year     | Label                            | Criteria for MTD-1 diagnosis                                                                | Study groups                                                                                                                        | Assessment measures relevant to the respiratory category                                                                                                                                                                                                  | Main results for the respiratory category                                                                                                                                                                                                                                                                                                                                                                                                                                                                                                                                                                                                                                               |
|---------------------|----------------------------------|---------------------------------------------------------------------------------------------|-------------------------------------------------------------------------------------------------------------------------------------|-----------------------------------------------------------------------------------------------------------------------------------------------------------------------------------------------------------------------------------------------------------|-----------------------------------------------------------------------------------------------------------------------------------------------------------------------------------------------------------------------------------------------------------------------------------------------------------------------------------------------------------------------------------------------------------------------------------------------------------------------------------------------------------------------------------------------------------------------------------------------------------------------------------------------------------------------------------------|
| Belsky et al., 2021 | Primary muscle tension dysphonia | No secondary voice disorder                                                                 | <i>(Retrospective)</i><br><br>G1: 85 patients with MTD-1<br>G2: 85 vocally healthy (historical) controls                            | -Mean airflow<br>-Number of breaths<br>-Inspiratory/expiratory airflow durations<br>-Inspiratory/expiratory airflow volumes<br>-Phonation time<br>-Duration of reading<br><br>-CPP, SD<br>-Low to high ratio, SD<br>-CPP F0, SD<br>-CSID<br>-SPL          | The MTD-1 group had a significantly longer reading duration than the control group ( $p < .0001$ ), with longer inspiratory ( $p < .0009$ ) and expiratory airflow durations ( $p < .0001$ ).<br><br>Mean SPL was lower in the MTD group ( $p = .0016$ ), but other acoustic measures did not differ.                                                                                                                                                                                                                                                                                                                                                                                   |
| Cryns et al., 2021  | Functional dysphonia             | Score on the SVHI of 50 or higher<br>No lesions or other pathological changes of the larynx | G1a: 15 healthy females<br>G2a: subgroup of 6 healthy females with the best SVHI scores<br>G2b: 5 females with functional dysphonia | -Muscle thickness and change in thickness of the transverse abdominal (TAM) and internal oblique (IOM) muscles<br>-Recruitment of the TAM (abdominal hollowing test)<br>-Breathing behavior (abdominal, thoracic or mixed)<br>-Secondary motor activities | Participants in G2b had a thinner TAM at rest ( $p = .017$ ) and a greater increase in thickness during the crescendo task in mm and percent change ( $p = .03$ ) when compared to G2a. They had a greater increase in TAM thickness during the prolonged exhalation task in mm and percent change when compared to G1a ( $p = .025$ ; $p = .005$ , respectively) and G2a ( $p = .017$ ; $p = .009$ , respectively). No difference was observed for the IOM.<br><br>Regarding the abdominal hollowing test, a lower number of participants in G2b successfully performed a pressure increase of 15mmHg when compared to those in G1a and G2a ( $p = .035$ , $p = .022$ , respectively). |

| Author(s), year        | Label                                    | Criteria for MTD-1 diagnosis                                             | Study groups                                                                                                                                                                                                                | Assessment measures relevant to the respiratory category                             | Main results for the respiratory category                                                                                                                                                                                                                                                                                                                                                                                                                                                                                         |
|------------------------|------------------------------------------|--------------------------------------------------------------------------|-----------------------------------------------------------------------------------------------------------------------------------------------------------------------------------------------------------------------------|--------------------------------------------------------------------------------------|-----------------------------------------------------------------------------------------------------------------------------------------------------------------------------------------------------------------------------------------------------------------------------------------------------------------------------------------------------------------------------------------------------------------------------------------------------------------------------------------------------------------------------------|
|                        |                                          |                                                                          |                                                                                                                                                                                                                             |                                                                                      | In G1a and G2b, abdominal breathing was predominant during all tasks. In G2b, thoracic and mixed breathing predominated, and secondary activity was present (particularly in the cervical spine, the lumbar spine, and the left arm and shoulder).                                                                                                                                                                                                                                                                                |
| Gillespie et al., 2013 | Primary muscle tension dysphonia/aphonia | Patient-perceived voice problem; no structural or neurologic abnormality | <i>(Retrospective)</i><br><br>G1: 90 women with MTD-1<br>G2 (normative sample): 45 healthy controls                                                                                                                         | -Estimated subglottal pressure (est-P <sub>sub</sub> )<br>-Average phonatory airflow | Estimated subglottal pressure and average phonatory airflow were significantly higher in the patient group when compared to healthy speakers ( $p < .001$ ; $p < .003$ , respectively).<br><br>Five combinations of est-P <sub>sub</sub> and average airflow were identified:<br>1) normal est-P <sub>sub</sub> – normal airflow<br>2) high est-P <sub>sub</sub> – normal airflow<br>3) normal est-P <sub>sub</sub> – high airflow<br>4) normal est-P <sub>sub</sub> – low airflow<br>5) high est-P <sub>sub</sub> – high airflow |
| Gilman et al., 2019    | Muscle tension dysphonia                 | Not specified                                                            | 40 patients with voice disorders<br><br><i>Subgroups of patients with:</i><br>G1: benign lesions ( $n = 9$ )<br>G2: vocal fold paralysis/paresis ( $n = 9$ )<br>G3: MTD ( $n = 8$ )<br>G4: edema or laryngitis ( $n = 11$ ) | -Mean airflow<br>-Expiratory volume<br>-Inspiratory volume                           | There was no significant difference in mean airflow, inspiratory volume, or expiratory volume between diagnosis groups during running speech.<br><br>Examination of individual data revealed different respiratory patterns, such as breath holding.                                                                                                                                                                                                                                                                              |

| Author(s), year     | Label                                                  | Criteria for MTD-1 diagnosis                                                 | Study groups                                                                  | Assessment measures relevant to the respiratory category                                                                                                                                                                            | Main results for the respiratory category                                                                                                                                                                                                                                                                                                                                                                                                                                                                                                                                                                                                                                                                  |
|---------------------|--------------------------------------------------------|------------------------------------------------------------------------------|-------------------------------------------------------------------------------|-------------------------------------------------------------------------------------------------------------------------------------------------------------------------------------------------------------------------------------|------------------------------------------------------------------------------------------------------------------------------------------------------------------------------------------------------------------------------------------------------------------------------------------------------------------------------------------------------------------------------------------------------------------------------------------------------------------------------------------------------------------------------------------------------------------------------------------------------------------------------------------------------------------------------------------------------------|
|                     |                                                        |                                                                              | G5: chronic cough ( $n = 3$ )                                                 |                                                                                                                                                                                                                                     |                                                                                                                                                                                                                                                                                                                                                                                                                                                                                                                                                                                                                                                                                                            |
| Lowell et al., 2008 | “Voice disorder in the absence of laryngeal pathology” | Vocal symptoms (effort/work/tiredness/weak voice)<br>No vocal fold pathology | G1: 9 teachers with voice disorders<br>G2: 9 teachers without voice disorders | -Lung volume initiation and termination relative to resting expiratory level (LVI-R, LVT-R)<br>-Lung volume expenditure<br>-%VC/syllable<br>-Closed quotient (CQ)<br>-Contact index (CI)<br>-Effort ratings on a 100-mm VAS<br>-SPL | LVI-R was smaller in the mock teaching and loud mock teaching task in G1 when compared to G2 (significant between-groups differences, $p = .025$ and $p < .001$ , respectively).<br><br>No between-group differences or interaction effects were found for CQ and CI from electroglottography.<br><br>Changes in CI were found within breath groups during speech, indicative of a greater asymmetry of the contact-closing and opening phases as lung volume decreased ( $p < .001$ ).<br><br>Effort ratings were greater in the voice disorder group, but no between-group significant difference was found ( $p = .070$ ).<br><br>SPL was significantly lower in G1 when compared to G2 ( $p = .040$ ). |
| Lu et al., 2021     | Functional dysphonia                                   | Not specified                                                                | G1: 22 healthy controls<br>G2: 47 patients with functional dysphonia          | -Nasal airflow<br>-Breathing kinematics (chest vs abdomen)                                                                                                                                                                          | At rest, breathing times were shorter in G2 when compared to G1 ( $p < .05$ ), and chest amplitude during inhalation was greater ( $p < .05$ ) while abdomen amplitude was lower ( $p < .05$ ).<br><br>Chest breathing was also the predominant pattern during the vowel task, and a breath-holding phenomenon was reported (only in G2).                                                                                                                                                                                                                                                                                                                                                                  |

*Note.* CPP = cepstral peak prominence; SD = standard deviation; CSID = cepstral spectral index of dysphonia; SPL = sound pressure level; SVHI = Singing Voice Handicap Index; TAM = transverse abdominal muscles; IOM = internal oblique muscles; est- $P_{sub}$  = estimated subglottal pressure; LVI-R = lung volume initiation relative to resting expiratory level; LVT-R = lung volume termination relative to resting expiratory level; VC = vital capacity; VAS = visual analogue scale; CQ = closed quotient; CI = contact index.
