# Supplementary material
Source: publisher figshare collection journal article supplement (https://asha.figshare.com/articles/dataset/_/19586065)
Supplement: Supplementary file 5 [file 1]

**Supplemental Material S2.** Autonomic mechanisms: empirical studies.

| Author(s), Year                     | Label                                                         | Criteria for MTD-1 diagnosis                                                                                                          | Study groups                                                                                                                                            | Assessment measures relevant to the autonomic category                     | Main results for the autonomic category                                                                                                                                                                                                                                                                                                                                                                                                  |
|-------------------------------------|---------------------------------------------------------------|---------------------------------------------------------------------------------------------------------------------------------------|---------------------------------------------------------------------------------------------------------------------------------------------------------|----------------------------------------------------------------------------|------------------------------------------------------------------------------------------------------------------------------------------------------------------------------------------------------------------------------------------------------------------------------------------------------------------------------------------------------------------------------------------------------------------------------------------|
| Demmink-Geertman & Dejonckere, 2002 | Nonorganic habitual dysphonia                                 | Voice complaint<br>Perceptual deviance in voice production<br>Absence of structural change in the larynx or systemic organic etiology | G1: 83 patients with nonorganic habitual dysphonia<br>G2: 84 healthy controls                                                                           | Questionnaire of autonomic (neurovegetative) manifestations and complaints | Patients from G1 reported symptoms significantly more than the healthy controls from G2:<br>-general neurovegetative complaints ( $p < .000001$ );<br>-neurovegetative complaints related to voice ( $p < .000001$ );<br>-non-neurovegetative and non-voice complaints ( $p = .00001$ )                                                                                                                                                  |
| Demmink-Geertman & Dejonckere, 2008 | Nonorganic habitual dysphonia (also muscle tension dysphonia) | Voice complaint<br>Perceptual deviance in voice production<br>Absence of structural change in the larynx or systemic organic etiology | G1: 184 patients with nonorganic dysphonia<br>G2: 126 healthy controls<br>(these numbers include participants from Demmink-Geertman & Dejonckere, 2002) | Questionnaire of autonomic (neurovegetative) manifestations and complaints | Patients reported neurovegetative complaints significantly more than the healthy controls from G2:<br>-general neurovegetative complaints ( $p < .0000001$ );<br>-neurovegetative complaints related to voice ( $p < .0000001$ )<br><br>In the patient group, there was a decrease of complaints in the general and voice-related neurovegetative complaints following voice therapy ( $p < .000001$ and $p < .0000001$ , respectively). |
