# Supplementary material
Source: publisher figshare collection journal article supplement (https://asha.figshare.com/articles/dataset/_/19586065)
Supplement: Supplementary file 6 [file 1]

## Supplemental Material S5. Inflammatory mechanisms: empirical studies.

| Author(s), Year                 | Label                         | Criteria for MTD-1 diagnosis                                                                                                                       | Study groups                                                                                                                         | Assessment measures relevant to the inflammatory category                                                                                                                                                                                                                                   | Main results for the inflammatory category                                                                                                                                                                                                                                                                                                                                                                                                                                                                                                                                                                                                                                                                            |
|---------------------------------|-------------------------------|----------------------------------------------------------------------------------------------------------------------------------------------------|--------------------------------------------------------------------------------------------------------------------------------------|---------------------------------------------------------------------------------------------------------------------------------------------------------------------------------------------------------------------------------------------------------------------------------------------|-----------------------------------------------------------------------------------------------------------------------------------------------------------------------------------------------------------------------------------------------------------------------------------------------------------------------------------------------------------------------------------------------------------------------------------------------------------------------------------------------------------------------------------------------------------------------------------------------------------------------------------------------------------------------------------------------------------------------|
| Angsuwarangsee & Morrison, 2002 | Muscle misuse dysphonia (MMD) | “Absence of organic lesion or cause of dysphonia”<br>“History of vocal misuse or abuse”<br>“Demonstration of typical laryngoscopic pattern of MMD” | G1: 141 patients with MMD<br>G2: 324 individuals with non-MMD (includes other laryngeal/voice disorders as well as healthy subjects) | -GERD status assessed via symptom report, posterior glottal redness, and positive 24-hour pH probe<br><br><i>Manual/Palpatory examination:</i><br>tension in suprahyoid (SH), thyrohyoid (TH), cricothyroid (CT), and inferior pharyngeal constrictor (PC) muscle groups (0–3 Likert scale) | TH, CT, and PC tension ratings: significant main effect of group (MMD vs non-MMD) ( $p < .001$ )<br>TH and CT tension ratings: significant main effect of GERD status ( $p < .01$ )<br>Age, sex, thyrohyoid tension, and GERD status were significant predictors of MMD diagnosis ( $p = .0016$ , $p = .0000$ , $p = .0003$ , $p = .0128$ , respectively)<br><br>Specific tension pattern most often seen in MMD patients was MMD3, which involves anteroposterior supraglottic compression. Subgroup analyses showed that significant differences in TH and GERD between MMD and non-MMD were driven by the MMD3 subgroup. Authors speculated that this TH tension is an adaptive, protective mechanism against GER. |
| Karkos et al., 2007             | Functional dysphonia (FD)     | Dysphonia > 3 months<br>No puberphonia, SD, or visible organic lesions                                                                             | G1: 22 patients with FD<br>G2: 6 vocally healthy controls                                                                            | 24-hour dual-probe pH monitoring:<br>-Number of reflux episodes<br>-Number of reflux episodes > 5 minutes<br>-Longest reflux episode (s)                                                                                                                                                    | <i>All results are relative to vocally healthy control group unless otherwise specified</i><br><br><i>Inflammatory</i><br>Longest reflux episode: significant main effect of group ( $p = .039$ ) at pharyngeal probe site while supine; no significant main effects of group ( $p = .365$ ) at                                                                                                                                                                                                                                                                                                                                                                                                                       |

| Author(s), Year | Label | Criteria for MTD-1 diagnosis | Study groups | Assessment measures relevant to the inflammatory category                                                                                                                                                                                  | Main results for the inflammatory category                                                                                                                                                                                                                                                                                                                                                                                                                                                                                                                                                                                                                                                                                                                                                                                                                                                                                                                                                                                                                                                                                                                                                |
|-----------------|-------|------------------------------|--------------|--------------------------------------------------------------------------------------------------------------------------------------------------------------------------------------------------------------------------------------------|-------------------------------------------------------------------------------------------------------------------------------------------------------------------------------------------------------------------------------------------------------------------------------------------------------------------------------------------------------------------------------------------------------------------------------------------------------------------------------------------------------------------------------------------------------------------------------------------------------------------------------------------------------------------------------------------------------------------------------------------------------------------------------------------------------------------------------------------------------------------------------------------------------------------------------------------------------------------------------------------------------------------------------------------------------------------------------------------------------------------------------------------------------------------------------------------|
|                 |       |                              |              | <p>-Fraction of time with pH &lt; 4 (%)</p> <p>Health questionnaires</p> <p>Quality of life:</p> <p>-Vocal Performance Questionnaire</p> <p>-Harmony I-684 Symptom and Lifestyle Questionnaire</p> <p>-General Health Questionnaire-12</p> | <p>pharyngeal probe site while upright; no significant main effects of group (<math>p = .604</math>) at esophageal probe site</p> <ul style="list-style-type: none"> <li>FD group had significantly longer reflux episodes at pharyngeal probe site while supine</li> </ul> <p>Fraction of time pH &lt; 4: significant main effect of group (<math>p = .045</math>) at pharyngeal probe site while supine; no significant main effects of group (<math>p = .935</math>) at pharyngeal probe site while upright; no significant main effects of group (<math>p = .978</math>) at esophageal probe site</p> <ul style="list-style-type: none"> <li>FD group had a significantly greater percent time with pH &lt; 4 at pharyngeal probe site while supine</li> </ul> <p>Number of reflux episodes: no significant main effect of group (<math>p = .764</math>, pharyngeal; <math>p = .460</math>, esophageal) at either probe site or in any position</p> <p>Number of reflux episodes &gt; 5 minutes: no significant main effect of group (<math>p = .764</math>, pharyngeal; <math>p = .682</math>, esophageal) at either probe site or in any position</p> <p><i>Quality of Life</i></p> |

| Author(s), Year         | Label                    | Criteria for MTD-1 diagnosis                                                                                                    | Study groups                                                                         | Assessment measures relevant to the inflammatory category                                                                                                                                                                                                        | Main results for the inflammatory category                                                                                                                                                                                                                                                                                                                                                                                                                                                                                                      |
|-------------------------|--------------------------|---------------------------------------------------------------------------------------------------------------------------------|--------------------------------------------------------------------------------------|------------------------------------------------------------------------------------------------------------------------------------------------------------------------------------------------------------------------------------------------------------------|-------------------------------------------------------------------------------------------------------------------------------------------------------------------------------------------------------------------------------------------------------------------------------------------------------------------------------------------------------------------------------------------------------------------------------------------------------------------------------------------------------------------------------------------------|
|                         |                          |                                                                                                                                 |                                                                                      |                                                                                                                                                                                                                                                                  | <p>Vocal Performance Questionnaire: significant main effect of group (<math>p &lt; .001</math>)</p> <ul style="list-style-type: none"> <li>FD group had significantly lower scores (indicative of worse performance)</li> </ul> <p>Harmony I-684: significant main effect of group (<math>p &lt; .001</math>)</p> <ul style="list-style-type: none"> <li>FD group had significantly higher scores (indicative of worse performance)</li> </ul> <p>General Health Questionnaire: no significant main effect of group (<math>p = .065</math>)</p> |
| Koufman et al., 2000    | Muscle tension dysphonia | Not specified                                                                                                                   | 113 patients with laryngeal/voice disorders<br>Subgroup of MTD patients ( $n = 23$ ) | Prevalence of positive LPR diagnosis, as assessed by 24-hour dual pH probe (%)                                                                                                                                                                                   | <p>18 of 23 MTD patients (78%) had abnormal pH probe findings.</p> <p>In the overall sample, 73% of patients who got tested for reflux had an abnormal pH probe result (57/78).</p> <p>The overall prevalence of LPR in the total sample was 50%.</p> <p>No statistical analyses were conducted to compare different diagnosis groups.</p>                                                                                                                                                                                                      |
| Van Houtte et al., 2012 | Muscle tension dysphonia | Palpable tension of the (para)laryngeal musculature<br>History of “vocal abuse/misuse” and psychologically stressful situations | G1: 14 patients with MTD<br>G2: 14 vocally healthy controls                          | <p><i>Acoustic</i></p> <ul style="list-style-type: none"> <li>-Jitter (%)</li> <li>-Shimmer (%)</li> <li>-Dysphonia Severity Index (DSI)</li> </ul> <p><i>Aerodynamic</i></p> <ul style="list-style-type: none"> <li>-Maximum phonation time (MPT, s)</li> </ul> | <p><i>All results relative to vocally healthy control group unless otherwise specified</i></p> <p><i>Acoustic</i></p> <p>Jitter, shimmer: no significant main effect of group for jitter (<math>p = .201</math>) or shimmer (<math>p = .571</math>)</p>                                                                                                                                                                                                                                                                                         |

| Author(s), Year | Label | Criteria for MTD-1 diagnosis                                     | Study groups | Assessment measures relevant to the inflammatory category                                                                                                                                                                                                                                                                                                                                                                                                                          | Main results for the inflammatory category                                                                                                                                                                                                                                                                                                                                                                                                                                                                                                                                                                                                                                                                                                                                                                                                                                                                                                                                                                      |
|-----------------|-------|------------------------------------------------------------------|--------------|------------------------------------------------------------------------------------------------------------------------------------------------------------------------------------------------------------------------------------------------------------------------------------------------------------------------------------------------------------------------------------------------------------------------------------------------------------------------------------|-----------------------------------------------------------------------------------------------------------------------------------------------------------------------------------------------------------------------------------------------------------------------------------------------------------------------------------------------------------------------------------------------------------------------------------------------------------------------------------------------------------------------------------------------------------------------------------------------------------------------------------------------------------------------------------------------------------------------------------------------------------------------------------------------------------------------------------------------------------------------------------------------------------------------------------------------------------------------------------------------------------------|
|                 |       | Anterior-posterior compression, lateral compression<br>Dysphonia |              | <p>-Vital capacity (VC, cm<sup>3</sup>)</p> <p><i>Inflammatory</i></p> <p>-Reflux Severity Index</p> <p>-24-hour dual-channel pH probe</p> <p><i>Manometric</i></p> <p>-Upper esophageal sphincter pressure</p> <p><i>Quality of life</i></p> <p>-Dutch VHI-10</p> <p><i>Voice range profile (VRP)</i></p> <p>-Minimum intensity (dB)</p> <p>-Maximum intensity (dB)</p> <p>-Minimum F<sub>0</sub> (Hz)</p> <p>-Maximum F<sub>0</sub> (Hz)</p> <p>-Habitual F<sub>0</sub> (Hz)</p> | <p>Dysphonia Severity Index: significant main effect of group (<math>p &lt; .001</math>): MTD group had significantly worse DSI scores</p> <p><i>Aerodynamic</i></p> <p>Maximum phonation time, vital capacity: no significant main effect of group for MPT (<math>p = .241</math>) or VC (<math>p = .605</math>)</p> <p><i>Inflammatory</i></p> <p>Reflux Severity Index, total score: significant main effect of group (<math>p &lt; .001</math>): MTD group had significantly higher RSI scores</p> <p><i>Manometric</i></p> <p>Upper esophageal sphincter pressure: no significant main effect of group for any phonation condition</p> <p><i>Quality of Life</i></p> <p>Voice Handicap Index-10, total score: significant main effect of group (<math>p &lt; .001</math>): MTD group had significantly higher VHI-10 scores</p> <p><i>Voice Range Profile</i></p> <p>Minimum intensity: significant main effect of group (<math>p = .015</math>): MTD group had significantly higher minimum intensity</p> |

| Author(s), Year | Label | Criteria for MTD-1 diagnosis | Study groups | Assessment measures relevant to the inflammatory category | Main results for the inflammatory category                                                                                                                                                                                                                                                                                                                                                                                                                                                                                            |
|-----------------|-------|------------------------------|--------------|-----------------------------------------------------------|---------------------------------------------------------------------------------------------------------------------------------------------------------------------------------------------------------------------------------------------------------------------------------------------------------------------------------------------------------------------------------------------------------------------------------------------------------------------------------------------------------------------------------------|
|                 |       |                              |              |                                                           | <p>Maximum intensity: significant main effect of group (<math>p = .030</math>): MTD group had significantly lower maximum intensity</p> <p>Minimum <math>F_0</math>: no significant main effect of group (<math>p = .675</math>)</p> <p>Maximum <math>F_0</math>: significant main effect of group (<math>p = .036</math>): MTD group had significantly lower maximum <math>F_0</math></p> <p>Habitual <math>F_0</math>: no significant main effect of group for males (<math>p = .827</math>) or females (<math>p = .761</math>)</p> |

Note. MMD = muscle misuse dysphonia; GERD = gastroesophageal reflux disease; SH = suprahoid; TH = thyrohyoid; CT = cricothyroid; PC = pharyngeal constrictor; FD = functional dysphonia; DSI = Dysphonia Severity Index; VC = vital capacity; VHI = Voice Handicap Index;  $F_0$  = fundamental frequency.
